# Supplementary material for: The Molecular Landscape of Primary Acral Melanoma: A Multicenter Study of the Italian Melanoma Intergroup (IMI)
Source: MDPI journal article supplement (doi:10.3390/ijms22083826), 2021-04-07
Supplement: s1 [file s1]

**Table S3.** Survival analysis of the 42 patients with molecular data

| Clinical and pathological variables | DFS                  |              | OS                  |                   |
|-------------------------------------|----------------------|--------------|---------------------|-------------------|
|                                     | HR (95% CI)          | p-value      | HR (95% CI)         | p-value           |
| Age, years (n=42)                   | 1.01 (0.98 to 1.04)  | 0.54         | 1.05 (1.02 to 1.09) | <b>0.005</b>      |
| Breslow (n=40)                      | 1.20 (1.05 to 1.36)  | <b>0.008</b> | 1.26 (1.13 to 1.40) | <b>&lt;0.0001</b> |
| Mitosis, mm <sup>2</sup> (n=41)     | 1.01 (0.96 to 1.06)  | 0.66         | 1.04 (0.99 to 1.08) | 0.07              |
| Total CN aberrations (n=42)         | 1.00 (0.99 to 1.01)  | 0.82         | 1.00 (0.99 to 1.01) | 0.66              |
| Gains (n=42)                        | 1.00 (0.99 to 1.01)  | 0.97         | 1.00 (0.99 to 1.01) | 0.82              |
| Losses (n=42)                       | 1.00 (0.98 to 1.03)  | 0.56         | 1.00 (0.98 to 1.02) | 0.41              |
| Percentage of changed genome (n=42) | 1.00 (0.98 to 1.02)  | 0.37         | 1.00 (0.98 to 1.02) | 0.67              |
| TGCA classification:                |                      |              |                     |                   |
| - BRAF (n=14)                       | 1.35 (0.43 to 4.27)  | 0.51         | 0.39(0.13 to 1.18)  | 0.10              |
| - NRAS (n=11)                       | 0.66 (0.19 to 2.30)  | 0.61         | 0.42 (0.13 to 1.37) | 0.15              |
| - TWT (n=13)                        | Reference            |              | Reference           |                   |
| Tumor site:                         |                      |              |                     |                   |
| - Hand/foot (n=36)                  | Reference            | 0.63         | Reference           | 0.30              |
| - Nail (n=6)                        | 0.61 (0.08 to 4.59)  |              | 1.94 (0.56 to 6.70) |                   |
| Histotype:                          |                      |              |                     |                   |
| - ALM (n=35)                        | Reference            | 0.52         | Reference           | 0.28              |
| - Nevoid Melanoma, NM (n=7)         | 0.67 (0.19 to 2.28)  |              | 0.50 (0.15 to 1.72) |                   |
| pT:                                 |                      |              |                     |                   |
| - T1-T2 (n=5)                       | 0.35 (0.05 to 2.64)  | 0.31         | 0.55 (0.12 to 2.42) | 0.43              |
| - T3-T4 (n=35)                      | Reference            |              | Reference           |                   |
| Ulceration:                         |                      |              |                     |                   |
| - Absent (n=15)                     | Reference            | <b>0.01</b>  | Reference           | 0.12              |
| - Present (n=25)                    | 6.83 (1.56 to 29.90) |              | 2.22 (0.81 to 6.07) |                   |
| Lymphovascular Invasion:            |                      |              |                     |                   |
| - Absent (n=26)                     | Reference            | 0.12         | Reference           | 0.33              |
| - Present (n=13)                    | 2.15 (0.82 to 5.61)  |              | 1.55 (0.63 to 3.75) |                   |
| Perineural invasion:                |                      |              |                     |                   |
| - Absent (n=28)                     | Reference            | 0.68         | Reference           | 0.28              |
| - Present (n=11)                    | 0.80 (0.28 to 2.28)  |              | 1.67 (0.66 to 4.19) |                   |

<sup>a</sup>Hazard ratio (95% confidence interval)

Regression status was not included in this analysis due to the small number of patients with regression (n=3).
