# Supplementary material for: The Molecular Landscape of Primary Acral Melanoma: A Multicenter Study of the Italian Melanoma Intergroup (IMI)
Source: MDPI journal article supplement (doi:10.3390/ijms22083826), 2021-04-07
Supplement: s1 [file s1]

Table S2: NGS sequencing results

| ID<br>AM_case | Histotype | refGenome   | Gene     | RefSeq       | genome_position | nucleotide variant    | amino acid variant | coding_consequence | Cosmic ID   | FATHMM prediction |
|---------------|-----------|-------------|----------|--------------|-----------------|-----------------------|--------------------|--------------------|-------------|-------------------|
| AM_06         | ALM       | GRCh37/hg19 | ARID1A   | NM_006015    | 27100077        | c.3873G>T             | p.Glu1291Asp       | missense           | COSM7408869 | Pathogenic        |
| AM_15         | ALM       | GRCh37/hg19 | ADAMTS18 | NM_199355    | 77359816        | c.1979G>A             | p.Ser660Asn        | missense           | COSM8112067 | Pathogenic        |
| AM_16         | ALM       | GRCh37/hg19 | BRAF     | NM_004333    | 140453136       | c.1799T>A             | p.Val600Glu        | missense           | COSM476     | Pathogenic        |
| AM_17         | ALM       | GRCh37/hg19 | NOTCH1   | NM_017617    | 139391833       | c.6358C>T             | p.Arg2120Cys       | missense           | /           | VUS               |
| AM_20         | ALM       | GRCh37/hg19 | NRAS     | NM_002524    | 115258747       | c.35G>A               | p.Gly12Asp         | missense           | COSM564     | Pathogenic        |
| AM_20         |           | GRCh37/hg19 | PREX2    | NM_024870    | 69058536        | c.4180C>T             | p.Arg1394Trp       | missense           | COSM3750133 | Pathogenic        |
| AM_20         |           | GRCh37/hg19 | RB1      | NM_000321    | 49030387        | c.1862G>A             | p.Arg621His        | missense           | COSM4962401 | Pathogenic        |
| AM_21         | ALM       | GRCh37/hg19 | BRAF     | NM_004333    | 140453136       | c.1799T>A             | p.Val600Glu        | missense           | COSM476     | Pathogenic        |
| AM_21         |           | GRCh37/hg19 | TP53     | NM_000546    | 7577593         | c.686_687delGT        | p.Cys229Tyrfs*10   | frameshift         | COSM43648   | na                |
| AM_22         | ALM       | GRCh37/hg19 | BRAF     | NM_004333    | 140453136       | c.1799T>A             | p.Val600Glu        | missense           | COSM476     | Pathogenic        |
| AM_22         |           | GRCh37/hg19 | TP53     | NM_000546    | 7574029         | c.998G>A              | p.Arg333His        | missense           | COSM6008899 | Pathogenic        |
| AM_23         | ALM       | GRCh37/hg19 | NRAS     | NM_002524    | 115256528       | c.183A>T              | p.Gln61His         | missense           | COSM585     | Pathogenic        |
| AM_26         | NM        | GRCh37/hg19 | TERT     | NM_001193376 | 1295250         | c.-146C>T             | /                  | intergenic         | /           |                   |
| AM_26         |           | GRCh37/hg19 | NF1      | NM_000546    | 29533355        | c.1358G>A             | p.Gly453Asp        | missense           | na          |                   |
| AM_27         | ALM       | GRCh37/hg19 | PIK3CA   | NM_006218    | 178936029       | c.1571G>A             | p.Arg524Lys        | missense           | COSM53245   | Pathogenic        |
| AM_27         |           | GRCh37/hg19 | BRAF     | NM_004333    | 140453136       | c.1799T>A             | p.Val600Glu        | missense           | COSM476     | Pathogenic        |
| AM_27         |           | GRCh37/hg19 | TP53     | NM_000546    | 7578388         | c.542G>A              | p.Arg181His        | missense           | COSM10738   | Pathogenic        |
| AM_27         |           | GRCh37/hg19 | PTEN     | NM_000314    | 89712014        | c.632G>T              | p.Cys211Phe        | missense           |             |                   |
| AM_31         | ALM       | GRCh37/hg19 | NRAS     | NM_002524    | 115258748       | c.34G>T               | p.Gly12Cys         | missense           | COSM562     | Pathogenic        |
| AM_31         |           | GRCh37/hg19 | KDR      | NM_002253    | 55964922        | c.2315C>T             | p.Ala772Val        | missense           | COSM172826  | Pathogenic        |
| AM_31         |           | GRCh37/hg19 | KMT2C    | NM_170606    | 151962134       | c.1173C>A             | p.Cys391*          | nonsense           | COSM230133  | Pathogenic        |
| AM_31         |           | GRCh37/hg19 | KIT      | NM_000222    | 55593613        | c.1679T>A             | p.Val560Asp        | missense           | COSM1257    | Pathogenic        |
| AM_34         | ALM       | GRCh37/hg19 | MITF     | NM_198159    | 70008501        | c.1091G>A             | p.Arg364His        | missense           | COSM2784799 | Pathogenic        |
| AM_34         |           | GRCh37/hg19 | MITF     | NM_198159    | 70008489        | c.1079G>A             | p.Arg360Gln        | missense           | COSM4120058 | Pathogenic        |
| AM_34         |           | GRCh37/hg19 | TP53     | NM_000546    | 7574003         | c.1024C>T             | p.Arg342*          | nonsense           | COSM11073   | Pathogenic        |
| AM_45         | ALM       | GRCh37/hg19 | BAP1     | NM_004656    | 52437753        | c.1408G>A             | p.Gly470Arg        | missense           | COSM9312294 | na                |
| AM_45         |           | GRCh37/hg19 | BRAF     | NM_004333    | 140453135       | c.1799_1800delTGinsAC | p.Val600Asp        | missense           | COSM308550  | Pathogenic        |
| AM_45         |           | GRCh37/hg19 | GRIN2A   | NM_000833    | 9857574         | c.3827C>G             | p.Ala1276Gly       | missense           | COSM107888  | Pathogenic        |
| AM_54         | ALM       | GRCh37/hg19 | BRAF     | NM_004333    | 140453136       | c.1799T>A             | p.Val600Glu        | missense           | COSM476     | Pathogenic        |
| AM_54         |           | GRCh37/hg19 | TERT     | NM_001193376 | 1295250         | c.-146C>T             | /                  | intergenic         | /           |                   |
| AM_54         |           | GRCh37/hg19 | TP53     | NM_000546    | 7578212         | c.637C>T              | p.Arg213*          | nonsense           | COSM10654   | Pathogenic        |
| AM_55         | ALM       | GRCh37/hg19 | NRAS     | NM_002524    | 115256530       | c.181C>A              | p.Gln61Lys         | missense           | COSM580     | Pathogenic        |
| AM_55         |           | GRCh37/hg19 | TERT     | NM_001193376 | 1295228         | c.-124C>T             | /                  | intergenic         | /           |                   |
| AM_56         | ALM       | GRCh37/hg19 | NRAS     | NM_002524    | 115258744       | c.38G>A               | p.Gly13Asp         | missense           | COSM573     | Pathogenic        |
| AM_56         |           | GRCh37/hg19 | GRIN2A   | NM_000833    | 9858173         | c.3228C>A             | p.Asn1076Lys       | missense           | COSM9177401 | Pathogenic        |
| AM_57         | ALM       | GRCh37/hg19 | NRAS     | NM_002524    | 115256528       | c.183A>C              | p.Gln61His         | missense           | COSM586     | Pathogenic        |
| AM_58         | ALM       | GRCh37/hg19 | ARID1A   | NM_006015    | 27101259        | c.4541C>T             | p.Thr1514Met       | missense           | na          |                   |
| AM_58         |           | GRCh37/hg19 | SF3B1    | NM_012433    | 198283262       | c.466A>G              | p.Met156Val        | missense           | na          |                   |
| AM_58         |           | GRCh37/hg19 | MAP2K2   | NM_030662    | 4101088         | c.634G>T              | p.Asp212Tyr        | missense           | na          |                   |
| AM_60         | NM        | GRCh37/hg19 | ARID1A   | NM_006015    | 27102084        | c.5010G>A             | p.Trp1670*         | nonsense           | COSM5490625 | Pathogenic        |
| AM_60         |           | GRCh37/hg19 | KRAS     | NM_004985    | 25380315        | c.143G>A              | p.Gly48Glu         | missense           | na          |                   |
| AM_60         |           | GRCh37/hg19 | TP53     | NM_000546    | 7579344         | c.343C>T              | p.His115Tyr        | missense           | COSM4429612 | Pathogenic        |
| AM_60         |           | GRCh37/hg19 | DCC      | NM_005215    | 51056945        | c.4266G>T             | p.Gln1422His       | missense           | na          |                   |
| AM_63         | ALM       | GRCh37/hg19 | NOTCH2   | NM_024408    | 120548162       | c.205G>A              | p.Glu69Lys         | missense           | na          |                   |
| AM_63         |           | GRCh37/hg19 | NRAS     | NM_002524    | 115256529       | c.182A>G              | p.Gln61Arg         | missense           | COSM584     | Pathogenic        |
| AM_63         |           | GRCh37/hg19 | ERBB4    | NM_001042599 | 212576777       | c.1122T>G             | p.His374Gln        | missense           | COSM9359678 | Pathogenic        |
| AM_63         |           | GRCh37/hg19 | DDX3X    | NM_001356    | 41206111        | c.1616-1G>A           | p.?                | splice_acceptor    | na          |                   |
| AM_69         | ALM       | GRCh37/hg19 | KIT      | NM_000222    | 55599342        | c.2468A>G             | p.Tyr823Cys        | missense           | COSM18682   | Pathogenic        |
| AM_69         |           | GRCh37/hg19 | GRIN2A   | NM_000833    | 9857094         | c.4307A>G             | p.Asn1436Ser       | missense           | COSM7370288 | Pathogenic        |
| AM_69         |           | GRCh37/hg19 | NF1      | NM_000267    | 29576060        | c.4033A>T             | p.Lys1345*         | nonsense           | na          |                   |
| AM_69         |           | GRCh37/hg19 | TP53     | NM_000546    | 7577542         | c.739A>G              | p.Asn247Asp        | missense           | COSM45005   | Pathogenic        |
| AM_71         | NM        | GRCh37/hg19 | NRAS     | NM_002524    | 115256529       | c.182A>G              | p.Gln61Arg         | missense           | COSM584     | Pathogenic        |
| AM_72         | ALM       | GRCh37/hg19 | KIT      | NM_000222    | 55594221        | c.1924A>G             | p.Lys642Glu        | missense           | COSM1304    | Pathogenic        |
| AM_73         | ALM       | GRCh37/hg19 | SF3B1    | NM_012433    | 198267483       | c.1874G>T             | p.Arg625Leu        | missense           | COSM110695  | Pathogenic        |
| AM_73         |           | GRCh37/hg19 | TP53     | NM_000546    | 7578406         | c.524G>A              | p.Arg175His        | missense           | COSM10648   | Pathogenic        |
| AM_74         | ALM       | GRCh37/hg19 | PTEN     | NM_000314    | 89692851        | c.335T>C              | p.(Leu112Pro)      | missense           | COSM5106    | Pathogenic        |
| AM_75         | ALM       | GRCh37/hg19 | TERT     | NM_001193376 | 1295250         | c.-146C>T             | /                  | intergenic         | /           |                   |
| AM_75         |           | GRCh37/hg19 | BRAF     | NM_004333    | 140453136       | c.1799T>A             | p.Val600Glu        | missense           | COSM476     | Pathogenic        |
| AM_75         |           | GRCh37/hg19 | TP53     | NM_000546    | 7578212         | c.637C>T              | p.Arg213*          | nonsense           | COSM10654   | Pathogenic        |
