# Supplementary material for: The Molecular Landscape of Primary Acral Melanoma: A Multicenter Study of the Italian Melanoma Intergroup (IMI)
Source: MDPI journal article supplement (doi:10.3390/ijms22083826), 2021-04-07
Supplement: s1 [file s1]

**Table S1:** Custom panel used for genetic testing of acral melanomas. It consists in amplicons of median size range approximately of 150 bp, within the main genes involved in melanoma pathogenesis .

| Chromosome | Gene            | Transcript         | sequenced exons^             | Sequence     |
|------------|-----------------|--------------------|------------------------------|--------------|
| chr1       | AKT3            | ENST00000263826.9  | 2                            | NC_000001.11 |
| chr1       | NOTCH2          | ENST00000256646.6  | 1-3, 30-31, 34               | NC_000001.11 |
| chr1       | NRAS            | ENST00000369535.4  | 2-3                          | NC_000001.11 |
| chr1       | ARID1A          | ENST00000324856.11 | 2, 7, 16-20                  | NC_000001.11 |
| chr2       | ERBB4           | ENST00000342788.8  | 3-28                         | NC_000002.12 |
| chr2       | SF3B1           | ENSG00000115524    | 1-25                         | NC_000002.12 |
| chr3       | MITF            | ENST00000352241.8  | 2-10                         | NC_000003.12 |
| chr3       | PIK3CA          | ENST00000263967.3  | 2-10, 14-21                  | NC_000003.12 |
| chr3       | BAP1            | ENST00000460680.5  | 3-17                         | NC_000003.12 |
| chr4       | KIT +rs17084733 | ENST00000288135.5  | 2-6, 9, 11, 13-14, 17-19, 21 | NC_000004.12 |
| chr4       | KDR             | ENST00000263923.4  | 7-16, 20-26                  | NC_000004.12 |
| chr5       | TERT            | ENST00000310581.9  | promoter -300 exon 1         | NC_000005.10 |
| chr7       | MLL3 (KMT2C)    | ENST00000262189.10 | 6-10, 14, 18, 45-49, 58      | NC_000007.14 |
| chr7       | BRAF            | ENST00000288602.10 | 11 e 15                      | NC_000007.14 |
| chr7       | RAC1            | ENST00000356142.4  | 2                            | NC_000007.14 |
| chr8       | PREX2           | ENST00000288368.4  | 6, 8, 19, 32, 34, 38         | NC_000008.11 |
| chr9       | NOTCH1          | ENST00000277541.6  | 3, 6, 11, 17-23, 26-31, 34   | NC_000009.12 |
| chr9       | GNAQ            | ENST00000286548.8  | 4 e 5                        | NC_000009.12 |
| chr9       | CDKN2A          | ENST00000498124.1  | 1-3                          | NC_000009.12 |
| chr10      | PTEN            | ENST00000371953.7  | 1-9                          | NC_000010.11 |
| chr11      | CCND1           | ENST00000227507.2  | 1-5                          | NC_000011.10 |
| chr12      | CDK4            | ENST00000257904.10 | 2                            | NC_000012.12 |
| chr12      | KRAS            | ENST00000311936.7  | 2 e 3                        | NC_000012.12 |
| chr13      | RB1             | ENST00000267163.4  | 2-23                         | NC_000013.11 |
| chr15      | MAP2K1          | ENST00000307102.9  | 2-6                          | NC_000015.10 |
| chr16      | GRIN2A          | ENST00000396573.6  | 1-14                         | NC_000016.10 |
| chr16      | ADAMTS18        | ENST00000282849.9  | 3-23                         | NC_000016.10 |
| chr17      | NF1             | ENST00000358273.8  | 3-12, 17-34, 38, 39, 43-54   | NC_000017.11 |
| chr17      | TP53            | ENST00000269305.8  | 1-11                         | NC_000017.11 |
| chr18      | DCC             | ENST00000442544.6  | 1-29                         | NC_000018.10 |
| chr19      | GNA11           | ENST00000078429.8  | 4 e 5                        | NC_000019.10 |
| chr19      | MAP2K2          | ENSG00000126934    | 1-11                         | NC_000019.10 |
| chrX       | DDX3X           | ENST00000399959.6  | 2-4, 7-14                    | NC_000023.11 |

^splice site sequences at the intron-exon junction were included
